# Supplementary material for: Distinct Effects of Familial Parkinson’s Disease-Associated Mutations on α-Synuclein Phase Separation and Amyloid Aggregation
Source: MDPI journal article supplement (doi:10.3390/biom13050726), 2023-04-23
Supplement: s1 [file s1]

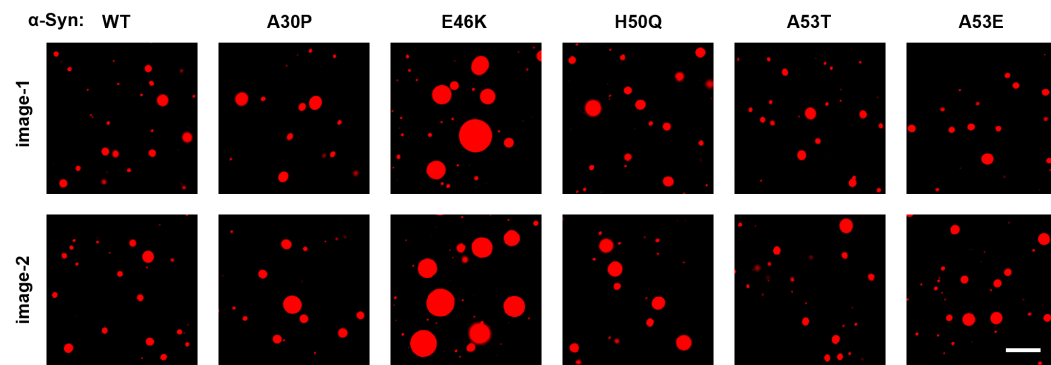

**Figure S1. Additional fluorescence images of WT and mutant  $\alpha$ -Syn droplets corresponding to Figure 1C. Scale bar, 5  $\mu$ m.**

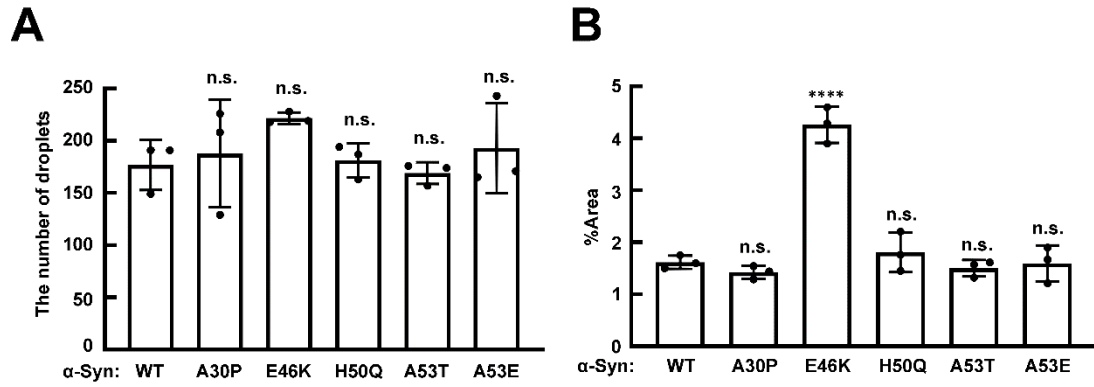

**Figure S2. The quantified numbers (A) and total area proportion (B) of WT and mutant  $\alpha$ -Syn droplets in the fluorescence images.** The total concentrations of  $\alpha$ -Syn WT and mutations are both 200  $\mu$ M. Three independent confocal images were analyzed by ImageJ. Data are presented as mean  $\pm$  SD ( $n = 3$  independent replicates). P values were calculated using one-way ANOVA with Tukey's multiple comparisons test. n.s.,  $P > 0.05$ . \*\*\*\*,  $P < 0.0001$ .

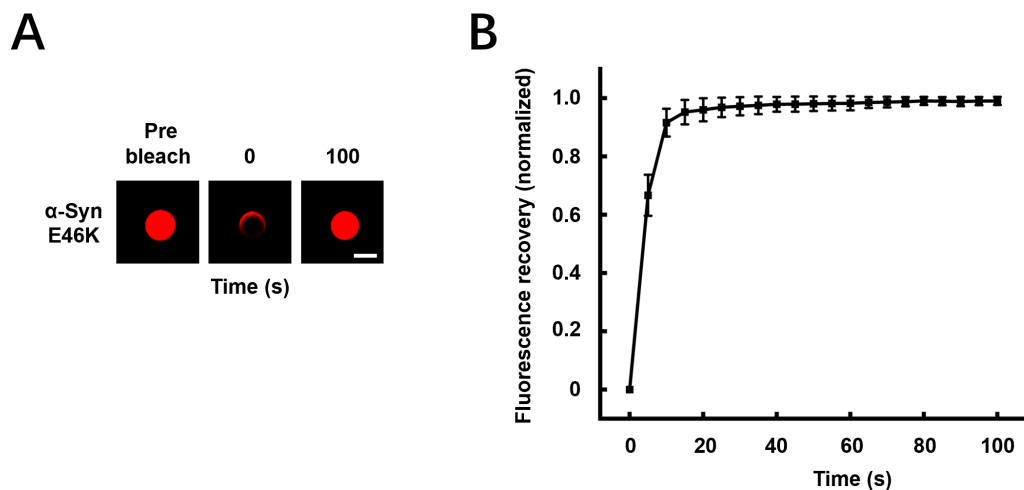

**Figure S3. The FRAP of  $\alpha$ -Syn E46K droplets with small size.** (A) Representative FRAP images of  $\alpha$ -Syn E46K droplets with small size. The fluorescence images of prebleached, bleached (0 s), and bleached after 100 s recovery are shown. Scale bar, 2  $\mu$ m. (B) The normalized FRAP curves of  $\alpha$ -Syn E46K droplets shown in A. Data are presented as mean  $\pm$  SD ( $n = 3$  independent replicates) and normalized to the maximal prebleach and minimal postbleach fluorescence intensities. The concentration of  $\alpha$ -Syn E46K mutant is 200  $\mu$ M and the experiments were carried out in the presence of 20% PEG-10000.

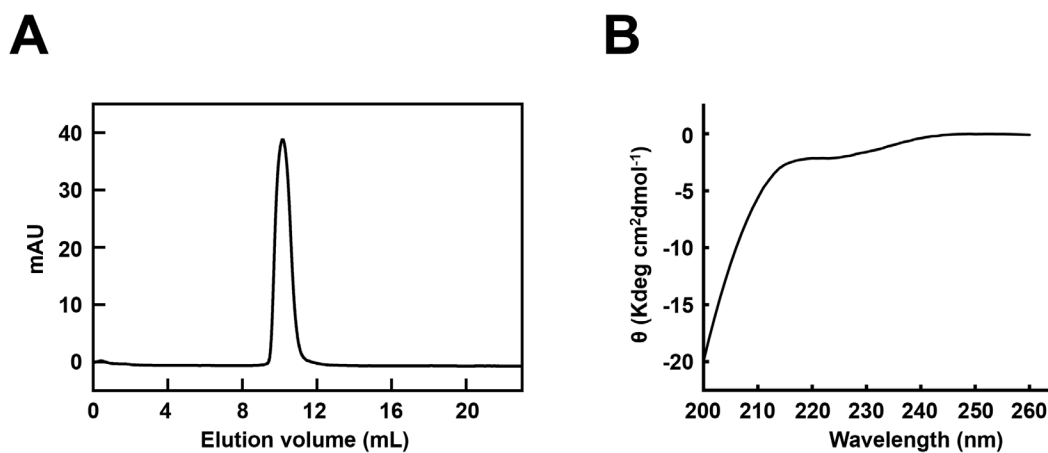

**Figure S4. Characterization of  $\alpha$ -Syn protein by gel filtration chromatography and CD spectroscopy.** (A) The gel filtration chromatography of purified  $\alpha$ -Syn protein showing a single elution peak using Superdex 75 Increase 10/300 GL. (B) CD measurement showing a random coil structure of  $\alpha$ -Syn.

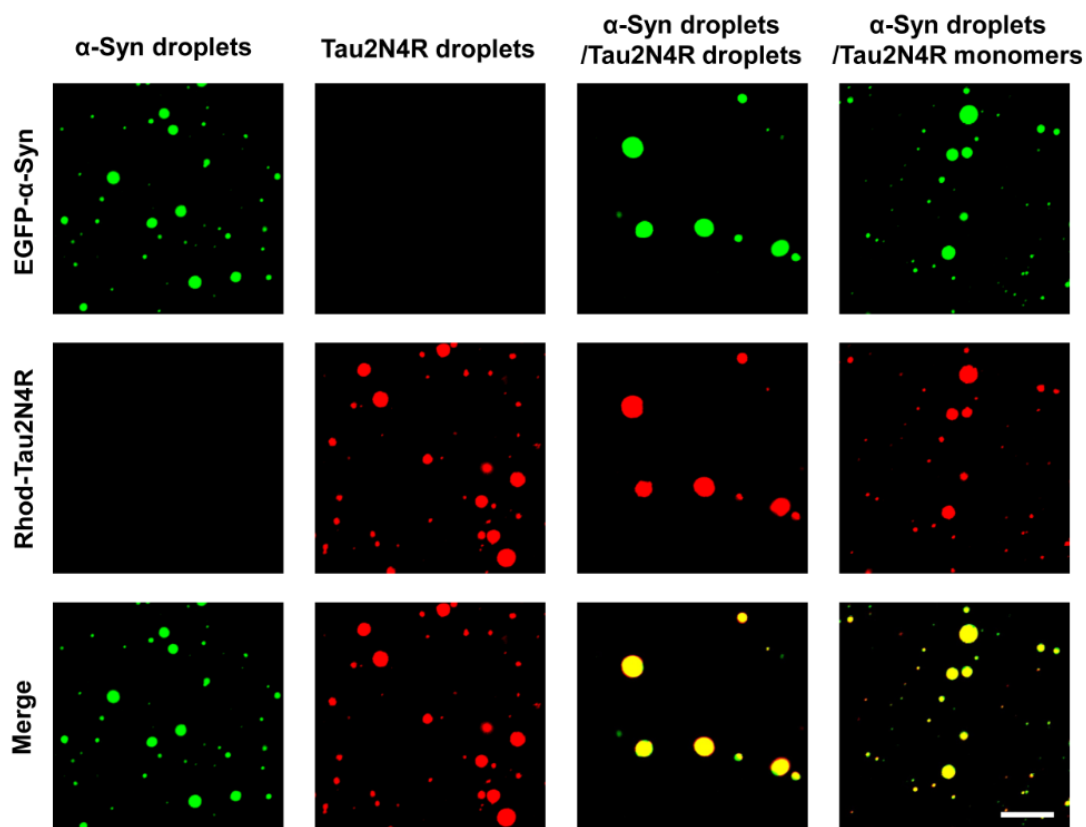

**Figure S5.  $\alpha$ -Syn droplets fuse with Tau2N4R droplets and recruit free Tau2N4R protein.** Representative images showing the fusion between  $\alpha$ -Syn droplets and Tau2N4R droplets and the recruitment of Tau2N4R monomers by  $\alpha$ -Syn droplets. The molar ratio of EGFP-labeled  $\alpha$ -Syn and Rhod-labeled Tau2N4R to unlabeled protein is 1:9, respectively. The total concentrations of  $\alpha$ -Syn and Tau2N4R are 200  $\mu$ M and 40  $\mu$ M to form droplets in the presence of 20% PEG-10000, respectively. For recruitment experiment, 2  $\mu$ M Rhod-labeled Tau2N4R monomers were added to preformed EGFP-labeled  $\alpha$ -Syn droplets. Scale bar, 5  $\mu$ m.

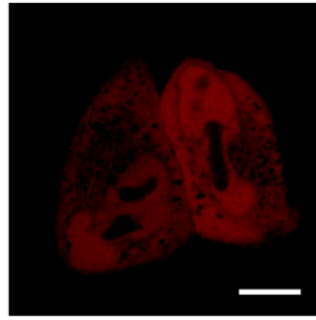

pmCherry C1 vector

**Figure S6. Representative confocal image of HeLa cells transfected with pmcherry C1 empty vector. Scale bar, 5 $\mu$ m.**
